# Supplementary material
Source: ML conference proceedings conference paper supplement (https://proceedings.neurips.cc/paper_files/paper/2020/hash/b6f8dc086b2d60c5856e4ff517060392-Abstract.html)
Supplement: Supplementary file [file b6f8dc086b2d60c5856e4ff517060392-Supplemental.pdf]

---

# Supplements of “Non-crossing quantile regression in deep reinforcement learning”

---

**Fan Zhou, Jianing Wang, Xingdong Feng**  
 School of Statistics and Management  
 Shanghai University of Finance and Economics  
 zhoufan@mail.shufe.edu.cn; jianing.wang@163.sufe.edu.cn;  
 feng.xingdong@mail.shufe.edu.cn

## 1 Proof of Lemma 1

We first introduce the following Lemma , which is used to complete the proof of Lemma 1.

**Lemma.** *Consider an MDP with countable state and action spaces. Let  $Z_1, Z_2$  be value distributions such that each state-action distribution of  $Z_1(s, a)$  or  $Z_2(s, a)$  is a single Dirac. Consider the particular case where rewards are identically 0, and let  $\tau \in [0, 1]$ . Denote by  $\Pi_\tau$  the projection operator that maps a probability distribution onto a Dirac delta located as its  $\tau$ -th quantile. Then*

$$\bar{d}_\infty(\Pi_\tau \mathcal{T}^\pi Z_1, \Pi_\tau \mathcal{T}^\pi Z_2) \leq \gamma \bar{d}_\infty(Z_1, Z_2), \quad (1)$$

*Proof.* The proof is similar to the argument of that of Lemma 3 of [1]. Let  $Z_1(s, a) = \delta_{q(s,a)}$  and  $Z_2(s, a) = \delta_{\psi(s,a)}$  for each state-action pair  $(s, a) \in \mathcal{S} \times \mathcal{A}$ , for some functions  $\psi, q : \mathcal{S} \times \mathcal{A} \rightarrow \mathbb{R}$ . Let  $(s', a')$  be a state-action pair, and let  $((s_i, a_i))_{i \in I}$  be all the state-action pairs that are accessible from  $(s', a')$  in a single transition, with  $I$  an indexing set. To simplify notations, we write  $q_i$  for  $q(s_i, a_i)$  and  $\psi_i$  for  $\psi(s_i, a_i)$ . Furthermore, let the probability of transiting from  $(s', a')$  to  $(s_i, a_i)$  be  $p_i$ , for all  $i \in I$ .

Then we have

$$\begin{aligned} (\mathcal{T}^\pi Z_1)(s', a') &= \gamma \sum_{i \in I} p_i \delta_{q_i}, \\ (\mathcal{T}^\pi Z_2)(s', a') &= \gamma \sum_{i \in I} p_i \delta_{\psi_i}. \end{aligned} \quad (2)$$

Now consider the  $\tau$ -th quantile of each of these distributions, for  $\tau \in [0, 1]$  arbitrary. Let  $u \in I$  be the index such that  $q_u$  is the  $\tau$ -th quantile of  $\sum_{i \in I} p_i \delta_{q_i}$ , and let  $v \in I$  be the index such that  $\psi_v$  is the  $\tau$ -th quantile of  $\sum_{i \in I} p_i \delta_{\psi_i}$ . Thus, we obtain that

$$\bar{d}_\infty(\Pi_\tau \mathcal{T}^\pi Z_1, \Pi_\tau \mathcal{T}^\pi Z_2) = \gamma |q_u - \psi_v|. \quad (3)$$

We now show that the inequality

$$|q_u - \psi_v| \leq |q_i - \psi_i|, \quad \forall i \in I, \quad (4)$$

holds, by which it follows that

$$\bar{d}_\infty(\Pi_\tau \mathcal{T}^\pi Z_1(s', a'), \Pi_\tau \mathcal{T}^\pi Z_2(s', a')) \leq \gamma \bar{d}_\infty(Z_1, Z_2), \quad (5)$$

and the result of Lemma 1 then follows by taking maxima over state-action pairs  $(s', a')$ .

To obtain the inequality (4), without loss of generality we take  $q_u \leq \psi_v$ . We now introduce the following partitions of the indexing set  $I$ . Let

$$\begin{aligned} I_{\leq q_u} &= \{i \in I \mid q_i \leq q_u\}, \\ I_{> q_u} &= \{i \in I \mid q_i > q_u\}, \\ I_{< \psi_v} &= \{i \in I \mid \psi_i < \psi_v\}, \\ I_{\geq \psi_v} &= \{i \in I \mid \psi_i \geq \psi_v\}, \end{aligned} \tag{6}$$

and we then have the following disjoint unions:

$$\begin{aligned} I &= I_{\leq q_u} \cup I_{> q_u} \\ I &= I_{< \psi_v} \cup I_{\geq \psi_v}. \end{aligned} \tag{7}$$

If the inequality (4) does not hold, then we must have  $I_{\leq q_u} \cap I_{\geq \psi_v} = \emptyset$ . It then follows that  $I_{\leq q_u} \subseteq I_{< \psi_v}$ . Thus, since  $q_u$  is the  $\tau$ -th quantile of  $\sum_{i \in I} p_i \delta_{q_i}$ , we obtain that

$$\sum_{i \in I_{\leq q_u}} p_i \geq \tau, \tag{8}$$

and so consequently

$$\sum_{i \in I_{< \psi_v}} p_i \geq \tau, \tag{9}$$

which implies that the  $\tau$ -th quantile of  $\sum_{i \in I} p_i \delta_{\psi_i}$  is less than  $\psi_v$ , and leads to a contraction. Therefore, the inequality (4) holds, which completes the proof.  $\square$

Now we give the proof of Lemma 1.

**Lemma 1.** *Let  $\Pi_{W_1}$  be the quantile projection defined as above, and when applied to value distributions gives the projection for each state-value distribution. For any two value distributions  $Z_1, Z_2 \in \mathcal{Z}$  for an MDP with countable state and action spaces,*

$$\bar{d}_\infty(\Pi_{W_1} \mathcal{T}^\pi Z_1, \Pi_{W_1} \mathcal{T}^\pi Z_2) \leq \gamma \bar{d}_\infty(Z_1, Z_2), \tag{10}$$

where

$$\bar{d}_p(Z_1, Z_2) := \sup_{s, a} W_p(Z_1(s, a), Z_2(s, a)), \tag{11}$$

and  $\mathcal{Z}$  be the space of action-value distributions with finite moments:

$$\mathcal{Z} = \{Z : \mathcal{S} \times \mathcal{A} \rightarrow \mathcal{P}(\mathbb{R}) \mid \mathbb{E}[|Z(s, a)|^p] < \infty, \forall (s, a), p \geq 1\}. \tag{12}$$

*Proof.* The proof is similar to the argument of that of Proposition 2 of [1]. We assume that instantaneous rewards given a state-action pair are deterministic, and the general case is a straight-forward generalization with the regular probability argument. Furthermore, since Wasserstein distances are invariant under translation of the support of distributions, it is sufficient to consider the case where  $r(s, a) \equiv 0$  for all  $(s, a) \in \mathcal{S} \times \mathcal{A}$ . The proof then proceeds by first considering the case where every value distribution consists only of single Diracs based on the result of Lemma 1.

We write  $Z_1(s, a) = \sum_{k=0}^{N-1} \frac{1}{N} \delta_{q_k(s, a)}$  and  $Z_2(s, a) = \sum_{k=0}^{N-1} \frac{1}{N} \delta_{\psi_k(s, a)}$ , where the functions  $q, \psi : \mathcal{S} \times \mathcal{A} \rightarrow \mathbb{R}^N$  are shape-constrained for ensuring non-crossing quantiles. Let  $(s, a)$  be a state-action pair, and let  $((s_i, a_i))_{i \in I}$  be all the state-action pairs that are accessible from  $(s', a')$  in a single transition, where  $I$  is a indexing set. Write  $p_i$  for the probability of transitioning from  $(s', a')$  to  $(s_i, a_i)$ , for each  $i \in I$ . We now construct a new MDP and new value distributions for this MDP in which all distributions are given by single Diracs, with a view to applying Lemma 1. The new MDP is of the following form. We take the state-action pair  $(s', a')$ , and define new states, actions, transitions and a policy  $\tilde{\pi}$ , so that the state-action pairs accessible from  $(s', a')$  in this new MDP are given by  $((\tilde{s}_i^j, \tilde{a}_i^j)_{i \in I})_{j=0}^{N-1}$ , and the probability of reaching the state-action pair  $(\tilde{s}_i^j, \tilde{a}_i^j)$  is  $p_i/N$ . Furthermore, we define new value distributions  $\tilde{Z}_1, \tilde{Z}_2$  as follows. For each  $i \in I$  and  $j = 0, \dots, N-1$ , we consider

$$\begin{aligned} \tilde{Z}_1(\tilde{s}_i^j, \tilde{a}_i^j) &= \delta_{q_j(s_i, a_i)} \\ \tilde{Z}_2(\tilde{s}_i^j, \tilde{a}_i^j) &= \delta_{\psi_j(s_i, a_i)}. \end{aligned} \tag{13}$$

Since the  $\bar{d}_\infty$  distance between the 1-Wasserstein projections of two real-valued distributions is the max over the difference of a certain set of quantiles, we may appeal to Lemma 1 to obtain the following result:

$$\begin{aligned} & \bar{d}_\infty \left( \Pi_{W_1} \left( \mathcal{T}^{\tilde{\pi}} \tilde{Z}_1 \right) (s', a'), \Pi_{W_1} \left( \mathcal{T}^{\tilde{\pi}} \tilde{Z}_2 \right) (s', a') \right) \\ & \leq \gamma \sup_{\substack{j=0, \dots, N-1 \\ i \in I}} |q_j(s_i, a_i) - \psi_j(s_i, a_i)| \\ & = \gamma \sup_{i \in I} \bar{d}_\infty (Z_1(s_i, a_i), Z_2(s_i, a_i)). \end{aligned} \quad (14)$$

Now note that by construction,  $(\mathcal{T}^{\tilde{\pi}} \tilde{Z}_1)(s', a')$  has the same distribution as  $(\mathcal{T}^\pi Z)(s', a')$ , and thus we have

$$\begin{aligned} & \bar{d}_\infty \left( \Pi_{W_1} (\mathcal{T}^{\tilde{\pi}} \tilde{Z}_1)(s', a'), \Pi_{W_1} (\mathcal{T}^{\tilde{\pi}} \tilde{Z}_2)(s', a') \right) \\ & = \bar{d}_\infty \left( \Pi_{W_1} (\mathcal{T}^\pi Z_1)(s', a'), \Pi_{W_1} (\mathcal{T}^\pi Z_2)(s', a') \right). \end{aligned} \quad (15)$$

Therefore, substituting this into (14), we obtain

$$\begin{aligned} & \bar{d}_\infty \left( \Pi_{W_1} (\mathcal{T}^\pi Z_1)(s', a'), \Pi_{W_1} (\mathcal{T}^\pi Z_2)(s', a') \right) \\ & \leq \gamma \sup_{i \in I} \bar{d}_\infty (Z_1(s_i, a_i), Z_2(s_i, a_i)). \end{aligned} \quad (16)$$

Taking suprema over the initial state  $(s', a')$  then yields the result.  $\square$

## 2 Proof of Theorem 1

**Theorem 1.** *The fixed point  $Z_q^*$  is of the form as  $Z_q^*(s, a) := \sum_{i=0}^{N-1} (\tau_{i+1} - \tau_i) \delta_{q_i(s, a)}$  with each quantile  $q_i$  satisfying the following equality*

$$\begin{aligned} q_i(s, a) &= R(s, a) + \gamma q_i(s', a'), \quad 0 \leq i \leq N-1, \\ s' &\sim p(\cdot | s, a), \quad a' \sim \pi(\cdot | s'), \end{aligned} \quad (17)$$

where  $\pi$  is a given policy. Let  $\Pi_{W_1} Z^\pi = \sum_{i=0}^{N-1} (\tau_{i+1} - \tau_i) \delta_{\bar{q}_i(s, a)}$ , with  $\bar{q}_i$  being the  $\hat{\tau}_i$ -th quantile of  $Z^\pi$ ,

we can obtain that

$$Z_q^* \stackrel{D}{=} \Pi_{W_1} Z^\pi. \quad (18)$$

When  $N \rightarrow \infty$ , we further have

$$\bar{d}_\infty(Z^\pi, Z_q^*) \rightarrow 0 \quad \text{and} \quad Z_q^* \rightarrow Z^\pi \text{ in distribution.} \quad (19)$$

*Proof.* Assume that the instantaneous rewards are deterministic given a stat-action pair and the total return  $Z^\pi$  has a continuous CDF  $F_{Z^\pi}(z)$ , which can also be generalized to the random case. For  $\epsilon > 0$ , let  $\tau_0 = \epsilon$ ,  $\tau_N = 1 - \epsilon$  and  $\tau_0, \dots, \tau_N$  are equidistant fractions, and  $\hat{\tau}_i = \frac{\tau_i + \tau_{i+1}}{2}$ . We firstly verify that  $Z_q^*$  is the fixed point of  $\Pi_{W_1} \mathcal{T}^\pi$ . In other words, we need to show that  $\Pi_{W_1} \mathcal{T}^\pi Z_q^* = Z_q^*$ . For any state-action pair  $(s, a)$ ,  $(s', a')$  is accessible from  $(s, a)$  in a single transition, by the definition of  $q_i$ , which is the  $\hat{\tau}_i$ -th quantile value, we have

$$\begin{aligned} & P(Z_q^*(s', a') \leq q_i(s', a')) \\ & = P(R(s, a) + \gamma Z_q^*(s', a') \leq R(s, a) + \gamma q_i(s', a')) \\ & = \hat{\tau}_i. \end{aligned} \quad (20)$$

By (17), we obtain that  $P(R(s, a) + \gamma Z_q^*(s', a') \leq q_i(s, a)) = \hat{\tau}_i$ . Note that  $P(Z_q^*(s, a) \leq q_i(s, a)) = \hat{\tau}_i$ . We then get that  $Z_q^*(s, a) \stackrel{D}{=} R(s, a) + \gamma Z_q^*(s', a')$  on each quantile fraction. Thus  $\mathcal{T}^\pi Z_q^* = Z_q^*$  holds. On the other hand, it is clear that  $Z_q^*$  is an element of  $\mathcal{Z}_Q$ , then the fixed point result follows.

Furthermore, due to the fact that  $\bar{q}_i$  is the  $\hat{\tau}_i$ -th quantile of  $Z^\pi$ , we have

$$P(Z^\pi(s, a) \leq \bar{q}_i(s, a)) = \hat{\tau}_i. \quad (21)$$

Recall the definition of  $Z^\pi$ , we then have

$$Z^\pi(s, a) = R(s, a) + \gamma Z^\pi(s', a'), \text{ for all } s' \sim P(\cdot|s, a), a' \sim \pi(\cdot|s'). \quad (22)$$

By (21) and (22), we obtain that

$$\begin{aligned} & P(Z^\pi(s, a) \leq \bar{q}_i(s, a)) \\ &= P(R(s, a) + \gamma Z^\pi(s', a') \leq \bar{q}_i(s, a)) \\ &= P(Z^\pi(s', a') \leq (\bar{q}_i(s, a) - R(s, a)) / \gamma) \\ &= \hat{\tau}_i, \text{ for all } s' \sim P(\cdot|s, a), a' \sim \pi(\cdot|s'). \end{aligned}$$

Therefore,

$$\bar{q}_i(s, a) = R(s, a) + \gamma \bar{q}_i(s', a'), \text{ for all } s' \sim P(\cdot|s, a), a' \sim \pi(\cdot|s'). \quad (23)$$

Due to the uniqueness of fixed point, we have  $Z_q^* \stackrel{D}{=} \Pi_{W_1} Z^\pi$ .

At last, it is straight to show  $\bar{d}_\infty(Z^\pi, \Pi_{W_1} Z^\pi) \rightarrow 0$  as  $N \rightarrow \infty$ . In fact, the monotonicity of  $F_{Z^\pi}^{-1}(\tau)$  implies that

$$\bar{d}_\infty(Z^\pi, \Pi_{W_1} Z^\pi) = \sup_i (\max(|F_{Z^\pi}^{-1}(\tau_i) - F_{Z^\pi}^{-1}(\hat{\tau}_i)|, |F_{Z^\pi}^{-1}(\tau_{i+1}) - F_{Z^\pi}^{-1}(\hat{\tau}_i)|)). \quad (24)$$

Since the quantile function  $F_{Z^\pi}^{-1}(\tau)$  is uniformly continuous on  $[\epsilon, 1 - \epsilon]$  because the distribution function  $F_{Z^\pi}(z)$  is assumed to be continuous, therefore, let  $N \rightarrow \infty$ , we have  $|\hat{\tau}_i - \tau_i| \rightarrow 0$  and  $|\hat{\tau}_i - \tau_{i+1}| \rightarrow 0$ , then  $\max(|F_{Z^\pi}^{-1}(\tau_i) - F_{Z^\pi}^{-1}(\hat{\tau}_i)|, |F_{Z^\pi}^{-1}(\tau_{i+1}) - F_{Z^\pi}^{-1}(\hat{\tau}_i)|) \rightarrow 0$ , for each  $i = 0, \dots, N-1$ , the result follows.

For  $\forall z \in (F_{Z^\pi}^{-1}(\tau_0), F_{Z^\pi}^{-1}(\tau_N))$ , we could find the index  $i$  such that  $F_{Z^\pi}^{-1}(\hat{\tau}_i) \leq z \leq F_{Z^\pi}^{-1}(\hat{\tau}_{i+1})$ . Then  $|F_{Z_q^*}(z) - F_{Z^\pi}(z)| \leq |\hat{\tau}_{i+1} - \hat{\tau}_i| \rightarrow 0$  as  $N \rightarrow \infty$ . Thus  $Z_q^*$  converges to  $Z^\pi$  in distribution.  $\square$

### 3 Figures 1 and 2

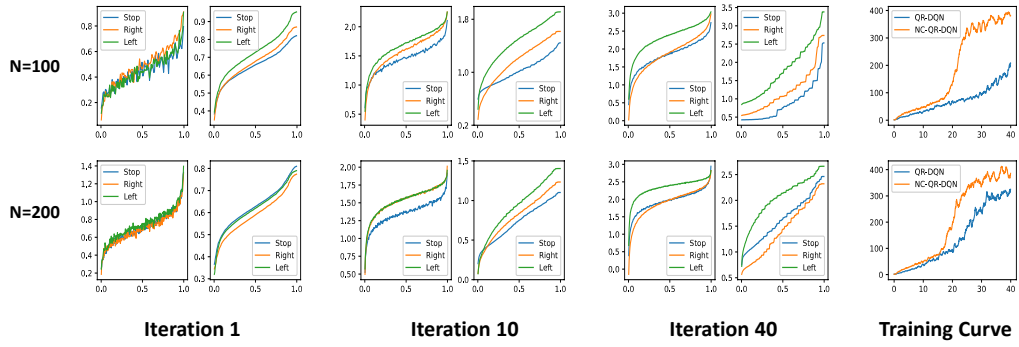

Figure 1: Training comparison between NC-QR-DQN and QR-DQN with  $N = 100$  and  $200$  on Breakout at different training stages

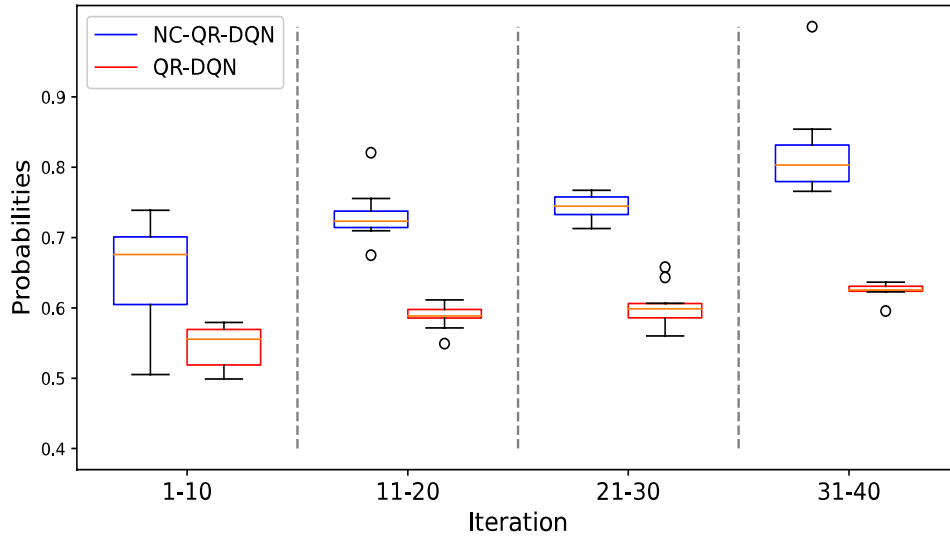

Figure 2: Boxplot of the probabilities that QRDQN or NC-QRDQN chooses the same action with the optimal policy for 4000 randomly selected states within each of four different training period

#### 4 Raw Score table across all Atari games

| GAMES            | RANDOM    | HUMAN    | DQN       | PRIOR. DUEL. | QR-DQN         | NC-QR-DQN          |
|------------------|-----------|----------|-----------|--------------|----------------|--------------------|
| Alien            | 227.8     | 7,127.7  | 1,620.0   | 3,941.0      | 4,871          | <b>10,277.4</b>    |
| Amidar           | 5.8       | 1,719.5  | 978.0     | 2,296.8      | 1,641          | <b>2,031.5</b>     |
| Assault          | 222.4     | 742.0    | 4,280.4   | 11,477.0     | <b>22,012</b>  | 21,766.5           |
| Asterix          | 210.0     | 8,503.3  | 4,359.0   | 375,080.0    | <b>261,025</b> | 148,681.1          |
| Asteroids        | 719.1     | 47,388.7 | 1,364.5   | 1,192.7      | <b>4,226</b>   | 2,824.8            |
| Atlantis         | 12,850.0  | 29,028.1 | 279,987.0 | 395,762.0    | 971,850        | <b>1,015,973.1</b> |
| BankHeist        | 14.2      | 753.1    | 455.0     | 1,503.1      | 1,249          | <b>1,357.5</b>     |
| BattleZone       | 2,360.0   | 37,187.5 | 29,900.0  | 35,520.0     | 39,268         | <b>55,675.6</b>    |
| BeamRider        | 363.9     | 16,926.5 | 8,627.5   | 30,276.5     | <b>34,821</b>  | 22,619.4           |
| Berzerk          | 123.7     | 2,630.4  | 585.6     | 3,409.0      | 3,117          | <b>170,386</b>     |
| Bowling          | 23.1      | 160.7    | 50.4      | 46.7         | 77.2           | <b>95.9</b>        |
| Boxing           | 0.1       | 12.1     | 88.0      | 98.9         | <b>99.9</b>    | <b>99.9</b>        |
| Breakout         | 1.7       | 30.5     | 385.5     | 366.0        | 742            | <b>749</b>         |
| Centipede        | 2,090.9   | 12,017.0 | 4,657.7   | 7,687.5      | <b>12,447</b>  | 10,206.9           |
| ChopperCommand   | 811.0     | 7,387.8  | 6,126.0   | 13,185.0     | <b>14,667</b>  | 10,458.3           |
| CrazyClimber     | 10,780.5  | 35,829.4 | 110,763.0 | 162,224.0    | 161,196        | <b>178,325.0</b>   |
| DemonAttack      | 152.1     | 1,971.0  | 12,149.4  | 72,878.6     | 121,551        | <b>122,737.0</b>   |
| DoubleDunk       | -18.6     | -16.4    | -6.6      | -12.5        | 21.9           | <b>22</b>          |
| Enduro           | 0.0       | 860.5    | 729.0     | 2,306.4      | <b>2,355</b>   | 2,342.6            |
| FishingDerby     | -91.7     | -38.7    | -4.9      | 41.3         | <b>39.0</b>    | 37.4               |
| Freeway          | 0.0       | 29.6     | 30.8      | 33.0         | 34.0           | <b>34.0</b>        |
| Frostbite        | 65.2      | 4,334.7  | 797.4     | 7,413.0      | 4,384          | <b>6,463.5</b>     |
| Gopher           | 257.6     | 2,412.5  | 8,777.4   | 104,368.2    | <b>113,585</b> | 82,954.2           |
| Gravitar         | 173.0     | 3,351.4  | 473.0     | 238.0        | 995            | <b>1,007.5</b>     |
| Hero             | 1,027.0   | 30,826.4 | 20,437.8  | 21,036.5     | 21,395         | <b>29,397</b>      |
| IceHockey        | -11.2     | 0.9      | -1.9      | -0.4         | -1.7           | <b>-0.8</b>        |
| Jamesbond        | 29.0      | 302.8    | 768.5     | 812.0        | 4,703          | <b>8,552</b>       |
| Kangaroo         | 52.0      | 3,035.0  | 7,259.0   | 1,792.0      | 15,356         | <b>16,987.5</b>    |
| Krull            | 1,598.0   | 2,665.5  | 8,422.3   | 10,374.4     | <b>11,447</b>  | 9,493.8            |
| KungFuMaster     | 258.5     | 22,736.3 | 26,059.0  | 48,375.0     | <b>76,642</b>  | 53,644             |
| MontezumaRevenge | 0.0       | 4,753.3  | 0.0       | 0.0          | 0.0            | <b>330.8</b>       |
| MsPacman         | 307.3     | 6,951.6  | 3,085.6   | 3,327.3      | 5,821          | <b>6,149</b>       |
| NameThisGame     | 2,292.3   | 8,049.0  | 8,207.8   | 15,572.5     | <b>21,890</b>  | 18,657.1           |
| Phoenix          | 761.4     | 7,242.6  | 8,485.2   | 70,324.3     | 16,585         | <b>32,797</b>      |
| Pitfall          | -229.4    | 6,463.7  | -286.1    | 0.0          | <b>0.0</b>     | <b>0.0</b>         |
| Pong             | -20.7     | 14.6     | 19.5      | 20.9         | <b>21.0</b>    | <b>21.0</b>        |
| PrivateEye       | 24.9      | 69,571.3 | 146.7     | 206.0        | <b>350</b>     | 200                |
| Qbert            | 163.9     | 13,455.0 | 13,117.3  | 18,760.3     | <b>572,510</b> | 25,317.9           |
| RiverRaid        | 1,338.5   | 17,118.0 | 7,377.6   | 20,607.6     | 17,571         | <b>19,545.4</b>    |
| RoadRunner       | 11.5      | 7,845.0  | 39,544.0  | 62,151.0     | 64,262         | <b>69,738</b>      |
| Robotank         | 2.2       | 11.9     | 63.9      | 27.5         | 59.4           | <b>71.6</b>        |
| Seaquest         | 68.4      | 42,054.7 | 5,860.6   | 931.6        | 8,268          | <b>62,300</b>      |
| Skiing           | -17,098.1 | -4,336.9 | -13,062.3 | -19,949.9    | -9,324         | <b>-9,034.1</b>    |
| Solaris          | 1,236.3   | 12,326.7 | 3,482.8   | 133.4        | <b>6,740</b>   | 2,140              |
| SpaceInvaders    | 148.0     | 1,668.7  | 1,692.3   | 15,311.5     | <b>20,972</b>  | 12,166.3           |
| StarGunner       | 664.0     | 10,250.0 | 54,282.0  | 125,117.0    | 77,495         | <b>146,337.5</b>   |
| Tennis           | -23.8     | -8.3     | 12.2      | 0.0          | 23.6           | <b>23.8</b>        |
| TimePilot        | 3,568.0   | 5,229.2  | 4,870.0   | 7,553.0      | <b>10,345</b>  | 8,145.6            |
| Tutankham        | 11.4      | 167.6    | 68.1      | 245.9        | 297            | <b>358</b>         |
| UpNDown          | 533.4     | 11,693.2 | 9,989.9   | 33,879.1     | <b>71,260</b>  | 34,886.1           |
| Venture          | 0.0       | 1,187.5  | 163.0     | 48.0         | 43.9           | <b>1,481</b>       |
| VideoPinball     | 16,256.9  | 17,667.9 | 196,760.4 | 479,197.0    | <b>705,662</b> | 561,229.6          |
| WizardOfWor      | 563.5     | 4,756.5  | 2,704.0   | 12,352.0     | 25,061         | <b>26,359.2</b>    |
| YarsRevenge      | 3,092.9   | 54,576.9 | 18,098.9  | 69,618.1     | 26,447         | <b>31,260.1</b>    |
| Zaxxon           | 32.5      | 9,173.3  | 5,363.0   | 13,886.0     | <b>13,112</b>  | 11,954.3           |

## References

- [1] Will Dabney, Mark Rowland, Marc G Bellemare, and Rémi Munos. Distributional reinforcement learning with quantile regression. In *Thirty-Second AAAI Conference on Artificial Intelligence*, 2018.
